# Supplementary material for: Epigenetic Modification of Death Receptor Genes for TRAIL and TRAIL Resistance in Childhood B-Cell Precursor Acute Lymphoblastic Leukemia
Source: Genes (Basel). 2021 Jun 5;12(6):864. doi: 10.3390/genes12060864 (PMC8229974; doi:10.3390/genes12060864)
Supplement: Supplementary file 1 [file genes-12-00864-s001.zip › Supplementary Tables.xlsx]

## Sheet: Supplementary Table1
Supplemantary Table 1
	Cell line		chromosomal abberations	%Inhibition by rhsTRAIL	mean %methylation of DR4		Relative mRNA expression of DR4	RFI of DR4	mean %methylation of DR5		Relative mRNA expression of DR5	RFI of DR5
	KOPN66bi	*	BCR-ABL1	85	0.47359	‡	14.7	1.5	49.2905		9.57	2.6
	YAMN91		BCR-ABL1	96	0.495913	‡	2.5	1	0.372546	‡	95.2	3.4
	YAMN73	*	BCR-ABL1	45	10.463		1.4	1.2	0.267794	‡	52.5	2.9
	KOPN72bi	*	BCR-ABL1	52	21.5756		19.6	1.7	3.1372		0.005	1.1
	KOPN57bi		BCR-ABL1	5	69.0058		0.36	1	5.95298		9.27	1.3
	KOPN30bi	*	BCR-ABL1	0	75.3393		0.049	1	0.318384	‡	22.7	1.7
	KOPN84	*	DUX4r	100	0.382039	‡	27.4	1.7	2.21659		16	1.3
	Nalm6	*	DUX4r	68	29.7471		0.867	1.5	0.483341	‡	2.04	2.5
	Reh	*	ETV6-RUNX1	99	0.379586	‡	3.4	1.4	0.382947	‡	227	2
	KOPN79	*	ETV6-RUNX1	23	7.36273		0.0004	1	0.866148	‡	148	2
	KOPN61		MEF2Dr	0	15.7477		0.00048	1	58.8908		0.0006	1
	KOPN70	*	MEF2Dr	2	78.7697		0.0007	1	78.09		0.0035	1
	KOPB26	*	MLLr	8	21.2673		2.39	1	2.09503		0.8	1
	KOCL51		MLLr	5	38.0824		0.0096	1	51.5134		5.39	1.2
	KOCL50	*	MLLr	8	78.8467		0.0009	1	63.1821		1.6	1.2
	KOCL69	*	MLLr	0	79.1481		0.0016	1	48.6398		3.43	1
	KOCL44	*	MLLr	0	87.4098		0.0097	1	94.4008		0.005	1
	KOCL33		MLLr	29	88.4336		0.0009	1	1.09658		12.1	3.3
	KOCL45	*	MLLr	5	90.5899		0.0062	1	0.350779	‡	0.388	1.5
	KOCL58		MLLr	0	92.3066		0.44	1.3	93.6052		0.00021	1
	KOPN1	*	MLLr	11	94.6657		0.00128	1	57.6073		2.17	1.6
	YCUB2	*	TCF3-HLF	100	0.173595	‡	8.44	2.5	0.39021	‡	1.33	3.1
	HAL-O1	†	TCF3-HLF	99	0.208898	‡	1.19	1.4	0.223811	‡	2.4	1.6
	Endo-kun	†	TCF3-HLF	99	0.279181	‡	3.04	1.8	0.336975	‡	8.79	2
	UOC-B1	†	TCF3-HLF	96	0.329139	‡	5.88	2	0.404451	‡	4	1.9
	697	*	TCF3-PBX1	99	0.330936	‡	0.58	1.1	94.0395		0.16	1.3
	KOPN63	*	TCF3-PBX1	35	7.74042		0.066	1	6.4964		14.7	1.2
	YAMN92		TCF3-PBX1	25	14.3529		62.6	1.8	11.2028		3.4	1.7
	YAMN90	*	TCF3-PBX1	3	16.8593		0.035	1	4.85655		1.7	1
	KOPN34		TCF3-PBX1	44	20.6044		5.16	1.1	7.86884		56.5	2.5
	KOPN36	*	TCF3-PBX1	0	68.9442		0.09	1	87.4049		0.0008	1
	KOPN60		TCF3-PBX1	9	91.4502		0.0033	1	93.7771		0.0005	1.3
	Abbreviations:rhsTRAIL, recombinant human soluble TNF-related apoptosis-inducing ligand; RFI, relative florescence intensity
	*, established at relapse; †, established at unknown timing; ‡,mean %methylation < 1%

## Sheet: Supplementary Table2
Supplemantary Table 2
	No.	Age (years old)	Sex	Onset or Relapse	NCI criteria	mean %methylation of DR4 gene	mean %methylation of DR5 gene	WBC(×103/μL)	PB Blast%	NCC in BM(×103/μL)	BM Blast%
	1	1	female	Onset	Standard	0.114833	0.228872	25.2	31	N.D.	N.D.
	2	1	female	Onset	Standard	0.187757	0.252243	47.8	95	N.D.	N.D.
	3	1	male	Onset(No.37)*	Standard	0.105265	0.165817	35.6	61	N.D.	N.D.
	4	2	male	Onset	Standard	0.533903	8.6765	23.9	45	N.D.	N.D.
	5	2	female	Onset	High	0.134545	0.245748	78.4	N.D.	N.D.	N.D.
	6	2	female	Onset	Standard	0.186431	0.19276	66	89	N.D.	N.D.
	7	2	female	Onset	Standard	0.206947	0.263037	8.3	61	14	98
	8	2	male	Onset	High	4.2298	6.22605	57.2	85	N.D.	95
	9	2	male	Onset	Standard	0.169197	0.339413	13.9	70	N.D.	N.D.
	10	2	male	Onset	Standard	0.177298	0.178005	40.4	N.D.	N.D.	N.D.
	11	3	female	Onset	Standard	0.418171	2.29286	9.8	54	N.D.	N.D.
	12	3	female	Onset	Standard	0.165624	0.236968	45.7	N.D.	N.D.	N.D.
	13	3	female	Onset	Standard	0.168221	0.766876	N.D.	N.D.	N.D.	N.D.
	14	3	female	Onset	Standard	0.12216	0.255803	45.1	N.D.	15	N.D.
	15	3	male	Onset(No.40)*	Standard	0.218641	0.317635	8.1	16	18	98
	16	3	female	Onset	Standard	0.161128	0.372722	31.6	N.D.	N.D.	N.D.
	17	4	female	Onset	Standard	0.0970292	0.253397	29.8	88	948	N.D.
	18	4	male	Onset(No.42)*	Standard	0.172581	0.210928	6.5	80	N.D.	N.D.
	19	5	female	Onset	High	0.146175	0.193914	160.2	100	698	99
	20	5	female	Onset	Standard	0.164606	0.264924	34.3	76	N.D.	N.D.
	21	5	male	Onset	Standard	0.173692	0.349133	9.1	24	N.D.	N.D.
	22	6	female	Onset	Standard	0.126409	0.222017	7	18	N.D.	90
	23	6	female	Onset	Standard	0.153227	0.25161	2.5	9	N.D.	N.D.
	24	7	female	Onset	Standard	0.163626	0.322417	2.6	0.5	N.D.	80
	25	8	male	Onset	Standard	0.151129	0.831801	12.8	60	N.D.	N.D.
	26	8	female	Onset	Standard	0.372757	0.29592	31.4	82	439	90
	27	9	female	Onset	High	0.149909	0.31934	112.3	90	N.D.	N.D.
	28	9	female	Onset	High	0.24817	0.302841	100	96	N.D.	N.D.
	29	9	male	Onset(No.47)*	Standard	0.159772	0.261231	8.5	N.D.	N.D.	60
	30	10	male	Onset	High	0.157647	0.247473	1.3	0	348	100
	31	12	female	Onset	High	0.203417	0.409791	2.7	11	644	95
	32	12	male	Onset	High	0.167182	0.438093	1.2	40	N.D.	95
	33	12	male	Onset	High	0.125696	0.138221	57.3	98	N.D.	N.D.
	34	12	male	Onset	High	0.304961	0.394658	142.8	89	522	N.D.
	35	13	male	Onset	High	0.323491	3.40861	29.3	79	6	N.D.
	36	3	female	Relapse	-	0.214853	0.222954	5	N.D.	N.D.	96
	37	3	male	Relapse(No.3)**	-	0.14445	0.177112	15.5	86	N.D.	N.D.
	38	4	female	Relapse	-	0.108574	0.222132	N.D.	N.D.	N.D.	35
	39	5	male	Relapse	-	0.134803	0.281544	11	82	N.D.	N.D.
	40	5	male	Relapse(No.15)**	-	0.148869	0.295208	5.4	N.D.	N.D.	N.D.
	41	7	female	Relapse	-	0.0815305	0.178189	6	0	N.D.	N.D.
	42	7	male	Relapse(No.18)**	-	0.196106	0.256853	N.D.	N.D.	N.D.	N.D.
	43	8	male	Relapse	-	0.130016	0.292942	350	97	N.D.	N.D.
	44	9	male	Relapse	-	0.170349	0.261715	16.1	67	128	90
	45	11	male	Relapse	-	0.220307	0.7189	N.D.	N.D.	N.D.	N.D.
	46	12	male	Relapse	-	0.133804	0.237771	12	70	36.3	25
	47	12	male	Relapse(No.29)**	-	0.142145	0.363834	5.7	7	N.D.	N.D.
	48	13	female	Relapse	-	0.145219	0.24656	N.D.	N.D.	N.D.	N.D.
	49	?	female	Relapse	-	0.141184	0.209628	N.D.	N.D.	N.D.	N.D.
	*, sample number at relapse; **, sample number at diagnosis
	Abbreviations: NCI, National Cancer Institute; WBC, white blood cells; PB, periphearl blood; NCC, nucleated cell count; BM, bone marrow; N.D., no data available
